# Supplementary material for: MutMap Approach Enables Rapid Identification of Candidate Genes and Development of Markers Associated With Early Flowering and Enhanced Seed Size in Chickpea (Cicer arietinum L.)
Source: Front Plant Sci. 2021 Jul 12;12:688694. doi: 10.3389/fpls.2021.688694 (PMC8313520; doi:10.3389/fpls.2021.688694)
Supplement: Supplementary Table 3 — Summary of the extreme bulks prepared for flowering time and seed size mutant based on phenotyping data generated on MutMap population derived from ICC 4958-M3-2828 × ICC 4958. [file Table_3.XLSX]

## Sheet: BULK prepared
Summary of the extreme bulks prepared for flowering time and seed size mutant based on phenotyping data generated on MutMap population derived from ICC4958-M3-2828 x ICC 4958
Cross	Days to flowering	Cross	Days to flowering			Cross	100 Seed weight	Cross	100 Seed weight
F1_17th_Plant_107	27	F1_2_Plant_84	60			F1_17th_Plant_17	40.963	F1_17th_Plant_107	43.197
F1_17th_Plant_108	29	F1_2_Plant_132	59			F1_17th_Plant_37	27.037	F1_17th_Plant_50	43.31
F1_17th_Plant_109	30	F1_2_Plant_91	60			F1_17th_Plant_109	30.168	F1_17th_Plant_83	43.57
F1_2_Plant_10	31	F1_2_Plant_93	60			F1_17th_Plant_103	35.937	F1_17th_Plant_12	43.571
F1_2_Plant_127	31	F1_2_Plant_2	59			F1_17th_Plant_75	36.74	F1_17th_Plant_40	43.587
F1_2_Plant_37	33	F1_2_Plant_6	59			F1_17th_Plant_76	38.36	F1_17th_Plant_26	43.993
F1_2_Plant_142	33	F1_2_Plant_7	59			F1_17th_Plant_1	38.53	F1_17th_Plant_59	44.02
F1_17th_Plant_55	33	F1_2_Plant_13	59			F1_17th_Plant_91	38.655	F1_17th_Plant_72	44.163
F1_17th_Plant_96	33	F1_2_Plant_147	59			F1_17th_Plant_41	39.253	F1_17th_Plant_80	44.207
F1_17th_Plant_97	33	F1_2_Plant_59	59			F1_17th_Plant_21	39.507	F1_17th_Plant_74	44.313
F1_17th_Plant_98	33	F1_2_Plant_65	59			F1_17th_Plant_73	39.933	F1_17th_Plant_99	44.563
F1_2_Plant_3	34	F1_2_Plant_82	59			F1_17th_Plant_36	40.083	F1_17th_Plant_52	45.045
F1_2_Plant_23	34	F1_2_Plant_89	59			F1_17th_Plant_89	40.117	F1_17th_Plant_45	46.113
F1_2_Plant_38	34	F1_2_Plant_134	59			F1_17th_Plant_34	40.193	F1_17th_Plant_94	46.213
F1_17th_Plant_47	34	F1_2_Plant_94	59			F1_17th_Plant_28	40.37	F1_17th_Plant_8	46.7
	Low Bulk
	High Bulk
P1	ICC 4958
P2	ICC 4958 M13 2828
